# Supplementary material for: The application research of integrating tutor-network-seminar and team-based teaching strategies in clinical practice teaching of laboratory medicine
Source: Research Square preprint supplement (doi:10.21203/rs.3.rs-8538440/v1), 2026-02-17
Supplement: Supplementary file 1 [file 2c3bd396b7e11c14d8fa23cb.docx]

Questionnaire for Practical Teaching Effectiveness Assessment in Medical Laboratory Science

Please rate each of the following statements based on your internship experience (1-Strongly disagree; 2-Disagree; 3-Neutral; 4-Agree; 5-Strongly agree).

Name: _____________ Total Score: ____________

| Survey dimensions | Score |
| --- | --- |
| Self-directed learning ability |  |
| 1. You can proactively retrieve literature and textbooks to address problems encountered during the internship. |  |
| 1. You have developed the ability to formulate and implement learning plans. |  |
| 1. You can effectively screen and integrate learning resources. (e.g., clinical guidelines, case repositories) |  |
| 1. You possess sustained motivation for continuous learning of new knowledge/technologies. |  |
| 1. You can independently identify and summarize your knowledge gaps in daily internship practice. |  |
| Abilities to integration of theory and practice |  |
| 1. You can apply textbook knowledge to specimen testing operations. |  |
| 1. You can explain the correlation between test results and disease mechanisms. |  |
| 1. You con formulate and modify testing protocols in response to specific clinical scenarios. |  |
| 1. You can critically evaluate and identify discrepancies between laboratory findings and clinical manifestations. |  |
| 1. You possess the ability to perform integrated analysis of quality control data and test errors for analytical troubleshooting. |  |
| Teamwork ability |  |
| 1. You are willing to proactively take on your assigned responsibilities in team tasks. |  |
| 1. You are willing to adjust your work pace to align with the team's objectives. |  |
| 1. You can work closely with team members to complete cross-verification work. |  |
| 1. Actively participates in team discussions on complex and difficult problems. |  |
| 1. You respect and are willing to adopt reasonable suggestions from others. |  |
| Communication skills |  |
| 1. You can clearly explain the limitations of test results to clinicians. |  |
| 1. You are able to meticulously document the entire testing process and any abnormal situations in strict accordance with established protocols. |  |
| 1. You can actively listen to and comprehend instructions from your tutor. |  |
| 1. You can accurately report critical values and abnormal results. |  |
| 1. You ensure seamless workflow transitions by coordinating effectively with colleagues. |  |
| Summarizing ability |  |
| 1. Regularly organize and summarize the laboratory diagnostic pathways for typical cases. |  |
| 1. You can identify the key control points within operational protocols. |  |
| 1. You have established response templates for abnormal results of common testing items. |  |
| 1. You have systematically summarized key points for handling different specimen types. |  |
| 1. You have developed a structured personal knowledge through documenting lessons learned and frequent errors. |  |
| Clinical Competence |  |
| 1. You can strictly implement biosafety protection procedures. |  |
| 1. You are familiar with the critical value reporting procedure of the clinical laboratory. |  |
| 1. You are able to independently complete the testing and review of routine items. |  |
| 1. You can optimize diagnostic testing panels through the critical integration of clinical information. |  |
| 1. You possess communication awareness for addressing potential medical disputes. |  |
