# Supplementary material for: The application research of integrating tutor-network-seminar and team-based teaching strategies in clinical practice teaching of laboratory medicine
Source: Research Square preprint supplement (doi:10.21203/rs.3.rs-8538440/v1), 2026-02-17
Supplement: Supplementary file 2 [file f415dbafefeba436d6b8d9b6.docx]

Satisfaction Survey of Practical Teaching in Medical Laboratory Science

Please rate the following statements based on your internship experience (1-Strongly disagree; 2-Disagree; 3-Neutral; 4-Agree; 5-Strongly agree)

Name: ______________ Total Score: ____________

| Survey dimensions | Score |
| --- | --- |
| Teaching methods |  |
| 1. The TNS-TBL teaching method can stimulate learning interest. |  |
| 1. Task/case design is closely aligned with the actual work scenarios of clinical laboratory testing. |  |
| 1. Teamwork processes (e.g., group discussions) are reasonably and efficiently designed. |  |
| 1. Teachers provide timely feedback on task completion. |  |
| 1. The teaching model facilitates independent thinking rather than passive acceptance. |  |
| Teaching content |  |
| 1. The teaching content covers core skills of the laboratory department (e.g., quality control/instrument operation/ Report verification) |  |
| 1. Teaching cases include common diseases and special cases. |  |
| 1. The depth of knowledge matches the cognitive level at the internship stage. |  |
| 1. Emphasizes the connection and application between laboratory testing and clinical diagnosis and treatment. |  |
| 1. Emerging technologies (e.g., molecular diagnosis) are timely integrated into the curriculum. |  |
| Teaching level |  |
| 1. Teachers possess solid professional knowledge and deliver clear explanations. |  |
| 1. Demonstration operations of teachers are standardized and rigorous. |  |
| 1. Effectively guides the handling of clinical emergencies (e.g., critical values). |  |
| 1. Patiently responds to students' questions. |  |
| 1. To evaluate student performance objectively and equitably. |  |
| Classroom atmosphere |  |
| 1. Teacher-student interaction is positive and harmonious. |  |
| 1. Encourages interprofessional collaborative discussions (e.g., communication with clinicians) |  |
| 1. Allows trial and error and guides reflection for improvement. |  |
| 1. There is a favorable atmosphere of collaborative and supportive among team members. |  |
| 1. The learning environment (laboratory/discussion room) is safe and comfortable. |  |
